# Supplementary material
Source: publisher figshare collection journal article supplement (https://acs.figshare.com/ndownloader/files/4673881)
Supplement: Supplementary file 1 [file 4673881]

## Supporting Information

### A Novel Functional Translocator Protein Ligand for Cancer Imaging

*Mingfeng Bai<sup>†</sup>, Malena B. Rone<sup>‡</sup>, Vassilios Papadopoulos<sup>‡</sup>, and Darryl J. Bornhop<sup>\*†</sup>*

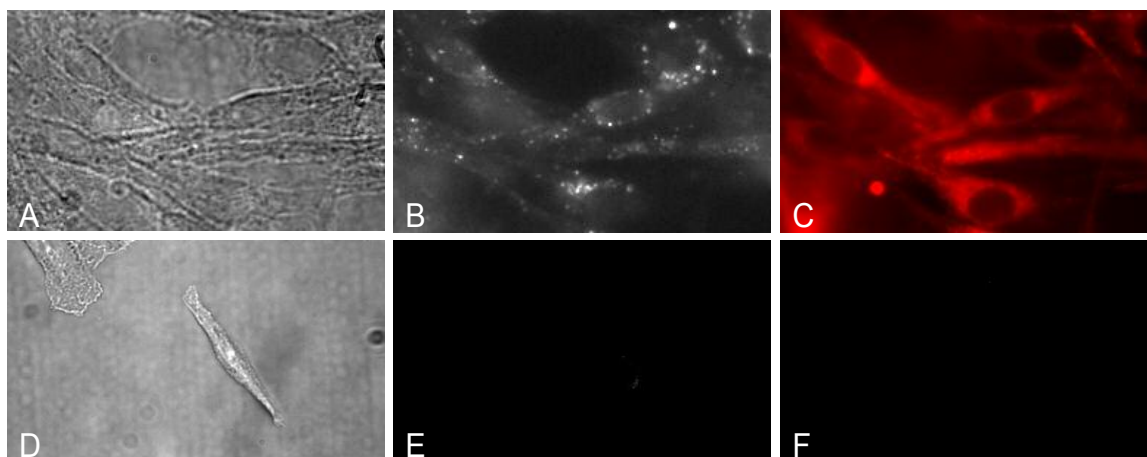

**Figure S1.** Fluorescence imaging of C6 rat glioma cells: (A) Phase contrast microscopy of cells dosed with NIR6T and Liss6T; (B) fluorescence imaging of cells dosed with 1  $\mu$ M NIR6T; (C) fluorescence imaging of cells dosed with 1  $\mu$ M Liss6T; (D) phase contrast microscopy of cells dosed with free NIR and lissamine dye; (E) fluorescence imaging of cells dosed with 1  $\mu$ M free NIR dye (control). (F) fluorescence imaging of cells dosed with 1  $\mu$ M free lissamine dye (control).

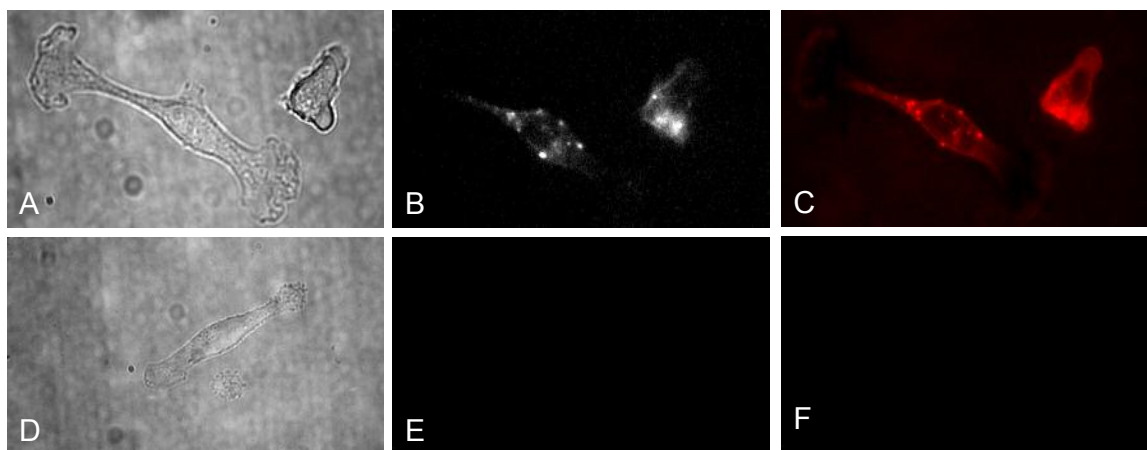

**Figure S2.** Fluorescence imaging of C6 glioma: (A) Phase contrast microscopy of cells dosed with NIR6T and Liss6T; (B) fluorescence imaging of cells dosed with 1  $\mu$ M NIR6T; (C) fluorescence imaging of cells dosed with 1  $\mu$ M Liss6T; (D) Phase contrast microscopy of cells dosed with free NIR and lissamine; (E) fluorescence imaging of cells dosed with 1  $\mu$ M free NIR dye (control). (F) fluorescence imaging of cells dosed with 1  $\mu$ M free lissamine dye (control).
